1 **Efficacy and safety of a novel vaginal medical device in recurrent bacterial**  
2 **vaginosis: an international multicentre clinical trial**

3 Filippo Murina<sup>a#</sup>, Ciprian Crişan<sup>b</sup>, Marius Biriş<sup>c</sup>, Daniela Sîrbu<sup>d</sup>, Dionisio Franco Barattini<sup>e</sup>,

4 Luca Ivan Ardolino<sup>f</sup>, Elena Casolati<sup>g</sup>

5 <sup>a</sup>: Lower Genital Tract Disease Unit, V. Buzzi Hospital-University of Milan, Italy

6 <sup>b</sup>: Clinica Medicală Dr. Crişan Ciprian, Timişoara, România

7 <sup>c</sup>: Clinica Medicală Biriş Marius, Timişoara, România

8 <sup>d</sup>: Clinica Medicală Dr. Sîrbu Daniela, Timişoara, România

9 <sup>e</sup>: Opera CRO, a TIGERMED Group company, Timişoara, România

10 <sup>f</sup>: Effik Italia, Milan, Italy

11 <sup>g</sup>: Private Practice of Obstetrics and Gynecology, Milan, Italy

12 Running title: POLARIS: Polybactum<sup>®</sup> to assess Recurrent Bacterial Vaginosis

13 #Address correspondence to Filippo Murina, [filippo.murina@asst-fbf-sacco.it](mailto:filippo.murina@asst-fbf-sacco.it)

|                           |                                                                                        |                                                                                                                                 |
|---------------------------|----------------------------------------------------------------------------------------|---------------------------------------------------------------------------------------------------------------------------------|
| Filippo Murina            | <a href="mailto:filippo.murina@asst-fbf-sacco.it">filippo.murina@asst-fbf-sacco.it</a> | Lower Genital Tract Disease Unit, Vittore Buzzi Hospital-University of Milan, Via Lodovico Castelvetro, 32 - 20154 Milano Italy |
| Ciprian Crişan            | <a href="mailto:drcipriancrisan@gmail.com">drcipriancrisan@gmail.com</a>               | Clinica Medicală Dr. Crişan Ciprian, Strada Salcânilor 22, Timişoara 300425, România                                            |
| Marius Biriş              | <a href="mailto:marius308@yahoo.com">marius308@yahoo.com</a>                           | Clinica Medicală Biriş Marius, Bd 16 Decembrie 1989 22-24, Timişoara, România                                                   |
| Daniela Sîrbu             | <a href="mailto:sirbudaniela47@yahoo.com">sirbudaniela47@yahoo.com</a>                 | Clinica Medicală Dr. Sîrbu Daniela, Str. Sfinţii Apostoli Petru şi Pavel 15, Timişoara, 300269 România                          |
| Dionisio Franco Barattini | <a href="mailto:barattini@operacro.com">barattini@operacro.com</a>                     | Opera CRO, a TIGERMED Group company, Strada Cozia 10, Timişoara 300209 România                                                  |
| Luca Ivan Ardolino        | <a href="mailto:Luca.Ardolino@effikitalia.it">Luca.Ardolino@effikitalia.it</a>         | Effik Italia, Via dei Lavoratori, 54 - 20092 Cinisello Balsamo Milano, Italy                                                    |
| Elena Casolati            | <a href="mailto:ecasolati@tin.it">ecasolati@tin.it</a>                                 | Private Practice of Obstetrics and Gynecology, Altamedica Milano, L. Ildefonso Schuster, 1 - 20122 Milano, Italy                |

## 14 ABSTRACT

15 Several risk factors have been identified but the etiology and pathogenesis of Bacterial  
16 vaginosis (BV) are still not completely understood, and the recurrence rate of BV remains  
17 high despite adequate chemotherapy treatment.

18 The primary objective of the study was to assess the effectiveness of a new vaginal  
19 medical device, which contains polycarbophil, 0.04 % lauryl glucoside, and glycerides  
20 (Polybactum® - Effik Italia), in reducing BV recurrence rate.

21 This was a multicenter, open label, not comparative study performed in Italy and Romania.  
22 Female subjects over 18-years-old affected by recurrent BV were included. The latest  
23 episode was diagnosed by Amsel criteria 6-9 days before the start of the study and treated  
24 with vaginal metronidazole (gel 0.75% mg for 5 days or ovules 500 mg for 7 days). The  
25 recurrence was defined by at least 2 episodes in the previous 12 months. Polybactum®  
26 vaginal ovules, day 1-4-7, were started within the 12th and the 24th hr after the end of  
27 metronidazole therapy and repeated monthly for 3 cycles.

28 The first 41 patients enrolled were evaluated for an interim analysis 6 months after the  
29 study started; 2 patients interrupted the trial, leaving 39 evaluable subjects. The  
30 recurrence rate was significantly reduced compared to previous published data (10.26% vs  
31 40%  $p < 0.001$ ). In 35 patients without recurrence, the assessment of *Lactobacillus* vaginal  
32 flora performed by phase contrast microscopy evidenced a significant improvement from  
33 baseline ( $p = 0.022$ ) The Investigator global assessment of tolerability was excellent in 38  
34 out of 39 cases.

## 35 IMPORTANCE

36 Bacterial vaginosis (BV) is the most common vaginal disorder in women of childbearing  
37 age. In BV, *Lactobacillus* species, which are predominant in a healthy vaginal flora, are  
38 replaced by anaerobes, mainly *Gardnerella vaginalis*. BV is responsible for more than 60%  
39 of vulvovaginal infections and has been linked to serious, potentially life-threatening

40 conditions, including: pelvic inflammatory disease, postoperative infections, acquisition and  
41 transmission of the human immunodeficiency virus, preterm birth, and several adverse  
42 pregnancy outcomes. Our research showed that 3 monthly cycles of Polybactum® ovules  
43 administered after one course of metronidazole vaginal therapy can reduce the rate of  
44 Bacterial vaginosis recurrence and improve the vaginal milieu, favouring the growth of  
45 vaginal lactobacillus species. Taken together our results confirm that Polibactum® is a  
46 safe and effective treatment to reduce BV recurrence rate after a first line therapy with  
47 metronidazole.

48 **Key words:** Bacterial vaginosis, recurrent vaginitis, biofilm, polycarbophil.

## 49 INTRODUCTION

50 Bacterial vaginosis (BV) is the most common vaginal disorder in women of childbearing  
51 age (1). In BV, Lactobacillus species, which are predominant in a healthy vaginal flora, are  
52 replaced by anaerobes, mainly *Gardnerella vaginalis*, but also *Atopobium vaginae*,  
53 *Mobiluncus mulieris*, *Prevotella bivia*, and *Fusobacterium nucleatum*.

54 BV is responsible for more than 60% of vulvovaginal infections and has been linked to  
55 serious, potentially life-threatening conditions, including: pelvic inflammatory disease,  
56 postoperative infections, acquisition and transmission of the human immunodeficiency  
57 virus, preterm birth, and several adverse pregnancy outcomes (2, 3, 4). Hydrogen  
58 peroxide and lactic acid-producing lactobacilli generally dominate the healthy vaginal  
59 epithelium, acting as a protective surfactant layer. This leads to an acidic pH that inhibits  
60 the adhesion and the growth of other bacteria, including opportunistic pathogens on the  
61 vaginal epithelium (5). During the development of BV, the normal vaginal microbiota  
62 composition changes, characterized by a decrease in the number of such lactobacilli  
63 species and an increase in the number of several pathogenic bacteria, mainly anaerobes  
64 (6). Although at least 50% of the infected women have no symptoms, the most common  
65 complaints are of abnormal vaginal discharge and fishy odor. Usually, the vulvovaginal

66 examination normal, apart from a discharge described as watery and gray. A correct  
67 diagnosis relies on finding three out of four Amsel criteria (abnormal gray discharge, high  
68 vaginal pH, positive amine test, and greater than 20% clue cells on saline microscopy),  
69 with a sensitivity of 92%(7). Metronidazole (oral or topical), tinidazole (oral), and  
70 clindamycin (oral or topical) are all recommended as initial treatments (8). The etiology  
71 and pathogenesis of this disease are not completely understood, because of the various  
72 BV-determining risk factors, , and the treatment is not always effective, resulting in high  
73 recurrence rates. After treatment, up to 58% of women might have a single recurrence or  
74 more within 12 months. Limited data is available regarding optimal management  
75 strategies for women with persistent or recurrent BV (8).

76 Recurrence are relates to the inability to offer a long-term defensive barrier, thus  
77 facilitating relapses. Furthermore, the resistance of pathogens to multiple drugs is a  
78 (relatively new) health problem that needs alternative treatments to be developed.

79 Recent studies have found that 90% of women with and 10% without BV have a complex  
80 polymicrobial biofilm, which can be demonstrated by electron microscopy of vaginal  
81 biopsies. On women with this disease, the biofilm consists primarily of *Gardnerella*  
82 *vaginalis*, sometimes including *Atopobium vaginae* (9). With standard antibiotic regimens,  
83 the bacterial load may decrease, but the biofilm may not be eliminated, thus setting the  
84 stage for recurrence after treatment. Slime produced by bacteria is a mechanism of  
85 forming biofilm that shields and protects microbes against the effects of antibiotics.

86 The objective of this study was to assess the effectiveness and safety of a new vaginal  
87 product that contains polycarbophil, 0.04 % lauryl glucoside, and glycerides (Polybactum®-  
88 Effik Italia) in reducing the rate of BV recurrence.

89 The rationale relates to the specific bacteriostatic action of Polybactum®, which inhibits  
90 bacterial growth, and its mucoadhesive property impairing the formation of biofilm  
91 produced by *Gardnerella vaginalis* and other bacteria. Furthermore, the product ensures

92 an acidifying effect on the vaginal pH which favors the growth of lactobacillus microbiota  
93 and at the same time maintains a hostile environment for the recolonization of the vagina  
94 by the polymicrobial flora involved in BV.

## 95 **MATERIALS AND METHODS**

96 **Trial design.** This was a multicenter, open label, not comparative study performed in Italy  
97 and Romania. The study protocol was identified with the acronym POLARIS  
98 (Polybactum<sup>®</sup> to assess Recurrent Bacterial Vaginosis) and was approved by the  
99 National Agency for Medicines and Medical Devices in Romania (Agentia Nationala a  
100 Medicamentului si a Dispozitivelor Medicale), notified to the Italian Ministry of Health and  
101 approved by the local Independent Ethics Committees pertaining to the investigational  
102 sites. The study was registered in clinicaltrials.gov as NCT02863536 (with attached full  
103 protocol).

104 During the trial, the protocol was amended to allow an interim analysis of 6 months after  
105 the start of patient enrolment.

106 **Participants.** Female subjects over 18-years-old affected by recurrent BV were included.  
107 They were diagnosed based on the Amsel criteria (10) in the 6-9 days before baseline  
108 and treated-with metronidazole vaginal formulations (gel for 5 days or ovules for 7 days).  
109 The recurrence was defined by at least 2 episodes of (BV) in the last 12 months, including  
110 the BV episode treated before baseline. Additional inclusion criteria: informed consent  
111 form (ICF) signed before starting the trial and the status of non-lactating women or  
112 lactating, but not amenorrhoeic women.

113 The exclusion criteria: pregnancy; candidiasis or mixed vaginitis; HIV or another  
114 immunodeficiency; known allergy to metronidazole or to Polybactum<sup>®</sup> ingredients;  
115 prostitution; ongoing menstruation or pre-menopause/menopause; patients concomitantly  
116 included in different interventional clinical trials; unwillingness to provide the informed  
117 consent to the trial; time between the last day of last menses and baseline visit >16 days

118 or  $\leq 5$  days (to avoid bias in case of a menstrual bleeding occurring during the first cycle  
119 with the tested medical device and the consequent need to interrupt its administration);  
120 participation in another clinical trial during the last month.

121 The sites were: Vittore Buzzi Hospital (Milan, coordinator site), AIED Center in Rome  
122 (Italy) and 3 private clinics specialized in gynaecology located in Timisoara (Romania). In  
123 each center, a lead Investigator was appointed to be responsible for the identification,  
124 recruitment, data collection, and completion of Case Report Forms, (CRFs) for patient  
125 adherence to protocol and for the sample collections to be transported to the local  
126 laboratory. The Investigators were specialists in gynaecology and trained in Good Clinical  
127 Practice (GCP). During the study, all the patients presented spontaneously at the  
128 Investigator's visit. No advertising was used to increase the enrolment rate.

129 **Interventions.** Prior to any study procedure, each patient was informed about the nature  
130 and purpose of the trial, the benefits and the risks, and was asked to sign an ICF.

131 The tested medical device administration (Polybactum<sup>®</sup> vaginal ovule) started within the  
132 12th and the 24th hr after the end of metronidazole vaginal treatment (5 g of 0.75% gel  
133 once daily for 5 days or 500 mg ovules once daily for 7 days) and continued for 3 cycles of  
134 treatment (minimum 72 and maximum 84 days); the duration of each cycle was one week,  
135 with the tested medical device administered as follows: one ovule inserted in the vagina on  
136 day 1, one ovule on day 4 and the last ovule on day 7. On the baseline visit, each patient  
137 received a total number of 9 ovules for the whole study duration (3 ovules for 3 cycles).  
138 The Investigator advised the patient to lay in a supine position for a couple minutes after  
139 the ovule had been inserted.

140 The baseline visit and the first cycle of Polybactum<sup>®</sup> fell within the 6th and the 16th day  
141 after the menstrual bleeding and after the end of metronidazole treatment. In the second  
142 and the third cycle, Polybactum<sup>®</sup> was administered immediately after the end of the  
143 previous menstrual bleeding.

144 In any case, the Investigator could always decide to stop administering the medical device  
145 for safety purposes or to prescribe other therapies if considered necessary for the patient's  
146 health.

147 The Sponsor, Effik Italia, supplied the investigational product. Patients were reminded to  
148 return all investigational product packages to the Investigator. At the end of the study, the  
149 Contract Research Organization (CRO) personnel involved in the trial performed the  
150 accountability of the tested medical device.

151 During the trial, there were disallowed: vaginal tampons; use of an etonogestrel/ethinyl  
152 estradiol vaginal ring (Nuvaring®) or an intrauterine device; oral or vaginal antibiotic  
153 therapy or other vaginal therapies (like douching, spermicide); oral or vaginal probiotics  
154 (e.g. vaginal lactobacilli); other products or medication to treat BV.

155 **Primary and secondary outcomes.** The primary outcome was the recurrence of BV  
156 identified by Amsel criteria (10), determined—at baseline and at final visit; a positive  
157 diagnosis of BV required meeting three of the following four criteria:

- 158 • vaginal pH greater than pH 4.5;
- 159 • proportion of clue cells  $\geq 20\%$  of total epithelial cells in the vaginal fluid;
- 160 • presence of white and thin vaginal discharge;
- 161 • fishy smell at whiff test.

162 BV was excluded if only two or less criteria were found at baseline. On the other hand, the  
163 patient was evaluated as a treatment failure when at least two criteria were met at the final  
164 visit. The primary outcome was measured at baseline and the final visit for all patients.

165 The secondary outcomes were the following: vaginal Lactobacillus microbiota assessed by  
166 an optical microscopy at baseline and at the final visit to evaluate the vaginal microflora  
167 return rate to normality (11) after Polybactum® treatment; signs and symptoms of BV  
168 (vaginal discharge, burning, erythema, dyspareunia). Vaginal discharge over the last 24  
169 hrs was evaluated using this analogic 3-point scale: 0= not present or physiological in

170 quantity, colour, and type; 1 = mild abnormal (abnormal quantity with normal colour and  
171 type); 2 = abnormal quantity, colour and type.

172 Burning intensity over the last 24 hrs was evaluated using an analogic 5-point scale: 0 =  
173 not present; 1 = mild; 2 = moderate; 3 = severe; 4 = unbearable. Grade of erythema was  
174 evaluated using the analogic 5-point scale: 0 = no symptoms; 1 = slight; 2 = moderate; 3 =  
175 marked; 4 = very marked. Dyspareunia was evaluated by a dichotomic scale: 0 = absent; 1  
176 = present. All secondary outcomes were measured at baseline and the final visit  
177 considering value change from baseline. Secondary outcome also included the patient  
178 assessing the efficacy at the last visit using the 4-point scale: 1 = very good improvement;  
179 2 = good improvement; 3 = moderate improvement and 4 = negligible improvement. Safety  
180 was evaluated collecting and analysing the adverse events during the study period and by  
181 a global assessment of safety performed by any Investigator using an analogic 4-point  
182 scale: 1 = excellent, 2 = good, 3 = fair and 4 = poor.

183 The study schedule included a visit at baseline (day 0), and a final visit (day 72 to day  
184 84). In addition, the Investigators planned to have 3 phone contacts with the patient: the  
185 first at day  $28 \pm 1$  after the last day of last menses, and the following two after  $28 \pm 1$  day  
186 apart. On any phone contact the Investigator checked if the patient had any of the BV  
187 symptoms and, in this case, performed an unscheduled visit to verify the BV recurrence  
188 based on Amsel criteria.

189 **Sample size determination and statistical methods.** According to published data, the  
190 mean recurrence rate of BV after a first episode is from 30 to 50% within 3 months after a  
191 first efficacious medical therapy (12); in the present study patients were not allowed oral  
192 or vaginal antibiotic therapy after metronidazole treatment for the 3 month study duration;  
193 therefore it should be realistic to have a 40% as mean recurrence rates in this study as  
194 well. In addition, in the recently collected data on recurrence rates post-treatment with  
195 Polybactum® (Effik Italia SpA, unpublished data), the correlation between paired



196 observation was 2% and after applying continuity correction, the study would require a  
197 sample size of 44 pairs to achieve a power of 80% and a one-sided significance of 5% for  
198 detecting a difference of 0.25 between marginal proportions. Considering the drop-out  
199 rate, 55 were enrolled (one group chi square test than a proportion equals user specified  
200 value non-inferiority). The level of significance of  $<0.5$  was considered statistically  
201 significant at 95% confidence interval. If a subject was missing information for one or  
202 more variables, the missing data were not replaced. If a subject were involved in violation  
203 of inclusion/exclusion criteria, the respective data were excluded from the analysis. Safety  
204 was evaluated in terms of adverse event findings. All subjects receiving at least one dose  
205 of treatment were included in the safety analysis. Analysis comparing the values between  
206 visits was done using t-test or chi squared test for quantitative variables, McNemar test  
207 for binary variables and symmetry test for qualitative variables. Kaplan Meier curves were  
208 used to analyse the time-to-event regarding BV recurrences. Statistical analysis was  
209 performed using SAS 9.2 (SAS Institute Inc., Cary, NC, USA).

210 **Guidelines and legislation.** The trial was performed in accordance with UNI EN ISO  
211 14155:2012, the ethical principles of the current version of the Declaration of Helsinki  
212 (64th WMA General Assembly, Fortaleza, Brazil, October 2013) and the Directive  
213 91/507/EEC, Guidelines for GCP. The privacy of patient data was protected following the  
214 current policy in Italy and in Romania.

215

## RESULTS

216 The data presented are an interim analysis performed 6 months after the first patient  
217 enrolled. Participants were recruited in 3 Romanian sites from September 8th, 2016 until  
218 December 13th, 2016. As shown in the flow diagram in Figure 1, out of 41 enrolled  
219 patients, 2 were excluded from PP analysis because they interrupted the trial for personal  
220 reasons not related to safety and 39 subjects were considered evaluable. One patient of  
221 these 39 did not complete the study period for intercurrent recurrence.

222 Age group distribution is summarized in Table 1. Treatment compliance rate (the total  
223 number of administered ovules from the total number of given ovules) was 97.01% for all  
224 the patients enrolled, and 100% considering only the patients who completed the trial. No  
225 relevant findings were evidenced in the medical history and during the physical  
226 examination. All the patients completed an antibiotic treatment with metronidazole vaginal  
227 formulation (ovules for 7 days) and no concomitant medication was recorded during the  
228 screening evaluation.

229 One of the inclusion criteria stated that only subjects with two or more episodes of BV in  
230 the last 12 months should enter the clinical trial. As observed in Table 2, 26 subjects  
231 (63.41%) had 2 episodes of BV in the last 12 months, with 12 subjects (29.27%) having 3  
232 episodes of BV, and 3 subjects (7.32%) with 4 episodes of BV.

233 In the analysis of the primary objective of the study, at the final visit (day 72 to day 84 from  
234 baseline), 4 recurrences were identified. Therefore, the recurrence rate of BV after 3  
235 months of treatment with Polybactum<sup>®</sup> was 10.26% (4 cases in 39). A statistically  
236 significant difference ( $p < 0.001$ ) was evidenced comparing this value with recurrence rate  
237 data (40%) published in the medical literature (12). To compare the actual recurrences  
238 belonging to our data with those from medical literature, we carried out a time-to-event  
239 analysis, also called Kaplan-Meier survival curves. Data are censored (the event did not  
240 occur during clinical trial period or subject's drop-out) or uncensored (the event occurred  
241 during the clinical trial). As observed from Figure 2, after 1 month of treatment, the  
242 probability of not having a BV recurrence is 97.6%; the same probability, at the final visit  
243 (after 3 months of treatment with Polybactum<sup>®</sup>) is 89.7%. Therefore, we can conclude that  
244 the true recurrence rate of BV after 3 months of treatment with Polybactum<sup>®</sup> is significantly  
245 smaller than the 40% reported by medical literature.

246 The evaluation of Vaginal Lactobacillus microbiota by microscopy using phase contrast of  
247 vaginal secretions was measured from lowest to highest concentration by the following 5-

248 point scale: absent, 1+, 2+, 3+, 4+ (13) at the baseline visit, and at the final visit (after 3  
249 months of Polybactum<sup>®</sup> treatment). For 26 out of 39 patients (66.67%) the treatment had a  
250 beneficial or neutral effect on the Lactobacillus concentration levels and only in 13 patients  
251 (33.33%) the concentration levels worsened (Figure 3). Chi-squared test evidenced that  
252 the differences between these values were at the limit of statistical significance (p-value =  
253 0.054). However, analysing the 35 patients without recurrences only, a statistically  
254 significant difference (Maxwell-Stuart asymptotic homogeneity test, p-value = 0.022) was  
255 evidenced in Lactobacillus concentration levels between baseline and final visit. (Figure 4)  
256 Throughout the study period, symptoms associated with BV (vaginal discharge, burning,  
257 erythema and dyspareunia) were monitored and recorded by the Principal Investigators in  
258 the CRFs and by subjects themselves in the Patient's Diary. The baseline and final data  
259 are reported in Table 3. It could be emphasized that the patients with abnormal symptoms  
260 at final visit are the four patients with recurrences and 1 additional patient with isolated  
261 mild vaginal discharge. These extremely positive results were confirmed by the global  
262 assessments of efficacy performed at the end of the study by patients. In fact, it was rated  
263 as very good per patient's assessments for 87.18% of them, good for 5.13%, moderate for  
264 2.56%, and negligible for 5.13% of the patients.

265 During the study, two adverse events have been reported. The cases (mild local itching  
266 and mild viral respiratory infection) were evaluated as not related to the tested medical  
267 device, recovered after a few days and in both cases the Investigator ruled out the  
268 suspicion of BV Recurrence. After the symptoms, the patient who experienced itching  
269 dropped out from the study for personal reasons, having completed only 1 cycle of  
270 treatment.

271 The Investigator's global assessment of tolerability was excellent (38 out of 39 cases) for  
272 97.43% and good for 2.57% (1 out of 39) of the patients.

273

## DISCUSSION

274 According to literature data, given the high prevalence of BV, there is an urgent need to  
275 develop products that effectively treat the condition and prevent its recurrence. In our  
276 study, the recurrence rate of BV after 3 months of treatment with Polybactum® was  
277 10.26%, significantly lower than the 40% presented in the medical literature. It is  
278 consented that BV involves the presence of a dense, structured and polymicrobial biofilm,  
279 primarily constituted by *Gardnerella vaginalis* clusters, strongly adhered to the vaginal  
280 epithelium.

281 Since the bacteria within biofilms are not effectively eliminated by the immune system or  
282 fully destroyed by antibiotics, biofilm-related infections tend to persist and thus,  
283 unsurprisingly, BV tends to have a high rate of relapse and recurrence (5).

284 Although the biofilm was shown to contain high concentrations of a variety of bacterial  
285 groups, *Gardnerella vaginalis* was the predominant constituent and it is now accepted that  
286 biofilms in BV are strongly associated with *Gardnerella vaginalis* (14). It was shown that  
287 *Gardnerella vaginalis* was able to adhere to and displace precoated protective lactobacilli  
288 from the vaginal epithelial cells, while other BV-associated anaerobes, such as *Atopobium*  
289 *vaginae* and *Prevotella*, were less virulent (15). Consequently, the current paradigm is that  
290 the establishment of a *Gardnerella vaginalis* biofilm is a required event for initiation and  
291 progression of BV (16).

292 The new product tested in our study contains polycarbophil, 0.04% lauryl glucoside,  
293 glycerides; all constituents that have important effects on the main mechanism involved in  
294 the pathogenesis of BV. In fact, lauryl glucoside has a specific bacteriostatic action which  
295 inhibits *Gardnerella vaginalis* growth. It was proven that *Gardnerella vaginalis* growth is  
296 reduced for 48 hrs by the contact with Polybactum® (already at 24 hrs) (17). The growth of  
297 inhibitory activity of the new vaginal product was also demonstrated against *Streptococcus*  
298 *agalactiae* and *Neisseria gonorrhoeae*. Polybactum® main components are polycarbophil  
299 (a safe film forming agent well known for its lack of toxicity) and lauryl glucoside, a non-

300 ionic surfactant reinforcing the film-forming effect by reducing surface tension. The  
301 combination of these factors gives the product the unique characteristics of a  
302 mucoadhesive property impairing the formation of the biofilm produced by *Gardnerella*  
303 *vaginalis*. Finally, an acidifying effect was observed on the vaginal pH which favors the  
304 growth of lactobacillus microbiota maintaining a hostile environment for the polymicrobial  
305 flora involved in BV to recolonize the vagina. Therefore, vaginal biofilms play a key role not  
306 only in BV pathogenesis, but also in its treatment failure and recurrence. Most proposed  
307 non-antibiotic therapies for BV are vaginal or oral probiotics, with the aim to restore the  
308 normal vaginal microbiota. Several trials evaluated the use of combined metronidazole  
309 and/or clindamycin therapy and vaginal probiotics to prevent BV recurrence, but large,  
310 randomized, placebo-controlled trials with standardized outcomes are needed to confirm  
311 the efficacy of this therapeutic approach for BV (18).

312 Our study focused on demonstrating that the use of Polybactum® in the treatment of BV  
313 not only reduces the rate of relapses, but it also improves the microbiological parameters.  
314 In fact, for 26 out of 35 patients without recurrences (74.28%), the clinical trial had a  
315 beneficial or neutral effect on the Lactobacillus concentration levels. From a clinical point  
316 of view, since metronidazole (the most commonly prescribed antibiotic to treat BV) causes  
317 only transient suppression of the *Gardnerella vaginalis* populations in the vagina (19), the  
318 combined therapy with this antibiotic plus Polybactum® can successfully reduce the  
319 anaerobic bacterial pathogens responsible for BV, delaying or preventing the relapse of  
320 vaginal infection, thus preventing the administration of antibiotics in repetitive courses.

321 Our study has certain limitations, such as the lack of a placebo treatment arm and only a  
322 3-month follow-up after the end of metronidazole treatment. This last problem will be  
323 corrected by the amendment already submitted to the EC to allow a follow up period of 12  
324 months after the end of the antibiotic therapy.

325 In any case, this study strengthens the evidence supporting the use of specific new vaginal  
326 products with well demonstrated activity associated with the creation and maintenance of a  
327 vaginal biofilm that hinders the persistence of an infection caused by BV.

## 328 **ACKNOWLEDGEMENTS**

329 Effik Italia (<http://www.effikitalia.it/>), the study Sponsor, offered a grant support. Effik Italia  
330 had no role in the study design, data collection and interpretation, or on the decision to  
331 submit the work for publication.

332 Warm thanks to Ramona Petrita and Andreea-Denisa Toma for support in data  
333 management and to Marius Ardelean for statistical analysis.

334 FM, CC, MB, and DS declare no conflict of interest. DFB is employed at Opera CRO, the  
335 Contract Research Organization that managed the study, EC is a medical consultant for  
336 Effik Italia, LIA is employed at Effik Italia.

337 **Authors' contribution:** FM originally conceived the project; FM and DFB draw up the  
338 study design and protocol. The final manuscript was written and approved by all authors.

## 339 **REFERENCES**

- 340 1. Schwebke JR, Muzny CA, Josey WE. Role of Gardnerella vaginalis in the  
341 pathogenesis of bacterial vaginosis: a conceptual model. J Infect Dis. 2014 Aug  
342 1;210(3):338-43. Available at: <https://doi.org/10.1093/infdis/jiu089>
- 343 2. Masson L, Mlisana K, Little F, Werner L, Mkhize NN, Ronacher K, Gamielien H,  
344 Williamson C, Mckinnon LR, Walzl G, Abdool Karim Q, Abdool Karim SS, Passmore  
345 JA. Defining genital tract cytokine signatures of sexually transmitted infections and  
346 bacterial vaginosis in women at high risk of HIV infection: a cross-sectional study.  
347 Sex Transm Infect. 2014 Dec;90(8):580-7. Available at:  
348 <https://doi.org/10.1136/sextrans-2014-051601>

- 349 3. Bretelle F, Rozenberg P, Pascal A, Favre R, Bohec C, Loundou A, Senat MV, Aissi  
350 G, Lesavre N, Brunet J, Heckenroth H, Luton D, Raoult D, Fenollar F; Groupe de  
351 Recherche en Obstetrique Gynecologie. High Atopobium vaginae and Gardnerella  
352 vaginalis vaginal loads are associated with preterm birth. Clin Infect Dis. 2015 Mar  
353 15;60(6):860-7. Available at: <https://doi.org/10.1093/cid/ciu966>
- 354 4. Petricevic L, Domig KJ, Nierscher FJ, Sandhofer MJ, Fidesser M, Krondorfer I,  
355 Husslein P, Kneifel W, Kiss H. Characterisation of the vaginal Lactobacillus  
356 microbiota associated with preterm delivery. Sci Rep. 2014 May 30;4:5136.  
357 Available at: <https://doi.org/10.1038/srep05136>
- 358 5. Terraf MC, Juárez Tomás MS, Nader-Macías ME, Silva C. Screening of biofilm  
359 formation by beneficial vaginal lactobacilli and influence of culture media  
360 components. J Appl Microbiol. 2012 Dec;113(6):1517-29. Available at:  
361 <https://doi.org/10.1111/j.1365-2672.2012.05429.x>
- 362 6. Swidsinski A, Mendling W, Loening-Baucke V, Ladhoff A, Swidsinski S, Hale LP,  
363 Lochs H. Adherent biofilms in bacterial vaginosis. Obstet Gynecol. 2005 Nov;106(5  
364 Pt 1):1013-23. <https://doi.org/10.1097/01.aog.0000183594.45524.d2>
- 365 7. Landers DV, Wiesenfeld HC, Heine RP, Krohn MA, Hillier SL. Predictive value of  
366 the clinical diagnosis of lower genital tract infection in women. Am J Obstet  
367 Gynecol. 2004 Apr;190(4):1004-10. Available at:  
368 <https://doi.org/10.1016/j.ajog.2004.02.015>
- 369 8. Sexually Transmitted Diseases: Summary of 2015 CDC Treatment Guidelines. J  
370 Miss State Med Assoc. 2015 Dec;56(12):372-5. Available at:  
371 <https://doi.org/10.1097/00007435-200306000-00013>
- 372 9. Verstraelen H, Swidsinski A. The biofilm in bacterial vaginosis: implications for  
373 epidemiology, diagnosis and treatment. Curr Opin Infect Dis. 2013 Feb;26(1):86-9.  
374 Available at: <https://doi.org/10.1097/qco.0b013e32835c20cd>

- 375 10. Sha BE, Gawel SH, Hershov RC, Passaro D, Augenbraun M, Darragh TM, Stek A,  
376 Golub ET, Mph LC, Moxley MD, Weber KM, Watts DH. Analysis of standard  
377 methods for diagnosing vaginitis: HIV infection does not complicate the diagnosis of  
378 vaginitis. *J Low Genit Tract Dis.* 2007 Oct;11(4):240-50. Available at:  
379 <https://doi.org/10.1097/lgt.0b013e318033dfed>
- 380 11. Donders GG. Treatment of sexually transmitted bacterial diseases in pregnant  
381 women. *Drugs.* 2000 Mar;59(3):477-85. Available at:  
382 <https://doi.org/10.2165/00003495-200059030-00005>
- 383 12. Bradshaw CS, Morton AN, Hocking J, Garland SM, Morris MB, Moss LM, Horvath  
384 LB, Kuzevska I, Fairley CK. High recurrence rates of bacterial vaginosis over the  
385 course of 12 months after oral metronidazole therapy and factors associated with  
386 recurrence. *J Infect Dis.* 2006 Jun 1;193(11):1478-86. Available at:  
387 <https://doi.org/10.1086/503780>
- 388 13. Nugent RP, Krohn MA, Hillier SL. Reliability of diagnosing bacterial vaginosis is  
389 improved by a standardized method of gram stain interpretation. *J Clin Microbiol.*  
390 1991 Feb;29(2):297-301. Available at: <https://jcm.asm.org/content/29/2/297.short>
- 391 14. Swidsinski A, Verstraelen H, Loening-Baucke V, Swidsinski S, Mendling W, Halwani  
392 Z. Presence of a polymicrobial endometrial biofilm in patients with bacterial  
393 vaginosis. *PLoS One.* 2013;8(1):e53997. Available at:  
394 <https://doi.org/10.1371/journal.pone.0053997>
- 395 15. Machado A, Salgueiro D, Harwich M, Jefferson KK, Cerca N. Quantitative analysis  
396 of initial adhesion of bacterial vaginosis-associated anaerobes to ME-180 cells.  
397 *Anaerobe.* 2013 Oct;23:1-4. Available at:  
398 <https://doi.org/10.1016/j.anaerobe.2013.07.007>
- 399 16. Machado A, Cerca N. Influence of Biofilm Formation by *Gardnerella vaginalis* and  
400 Other Anaerobes on Bacterial Vaginosis. *J Infect Dis.* 2015 Dec 15;212(12):1856-



- 401           61. Available at: <https://doi.org/10.1093/infdis/jiv338>
- 402           17. Ardolino LI, Meloni M, Brugali G, Corsini E, Galli CL. Preclinical Evaluation of  
403           Tolerability of a Selective, Bacteriostatic, Locally Active Vaginal Formulation. *Curr*  
404           *Ther Res Clin Exp.* 2016 Jul 25;83:13-21. Available at:  
405           <https://doi.org/10.1016/j.curtheres.2016.07.002>
- 406           18. Senok AC, Verstraelen H, Temmerman M, Botta GA. Probiotics for the treatment of  
407           bacterial vaginosis. *Cochrane Database Syst Rev.* 2009 Oct 7;(4):CD006289.  
408           Available at: <https://doi.org/10.1002/14651858.cd006289.pub2>
- 409           19. Mayer BT, Srinivasan S, Fiedler TL, Marrazzo JM, Fredricks DN, Schiffer JT. Rapid  
410           and Profound Shifts in the Vaginal Microbiota Following Antibiotic Treatment for  
411           Bacterial Vaginosis. *J Infect Dis.* 2015 Sep 1;212(5):793-802. Available at:  
412           <https://doi.org/10.1093/infdis/jiv079>
- 413

414  
415  
416  
417  
418  
419  
420  
421  
422  
423  
424  
425  
426  
427  
428  
429  
430  
431  
432  
433  
434  
435  
436  
437  
438  
439  
440  
441  
442  
443  
444

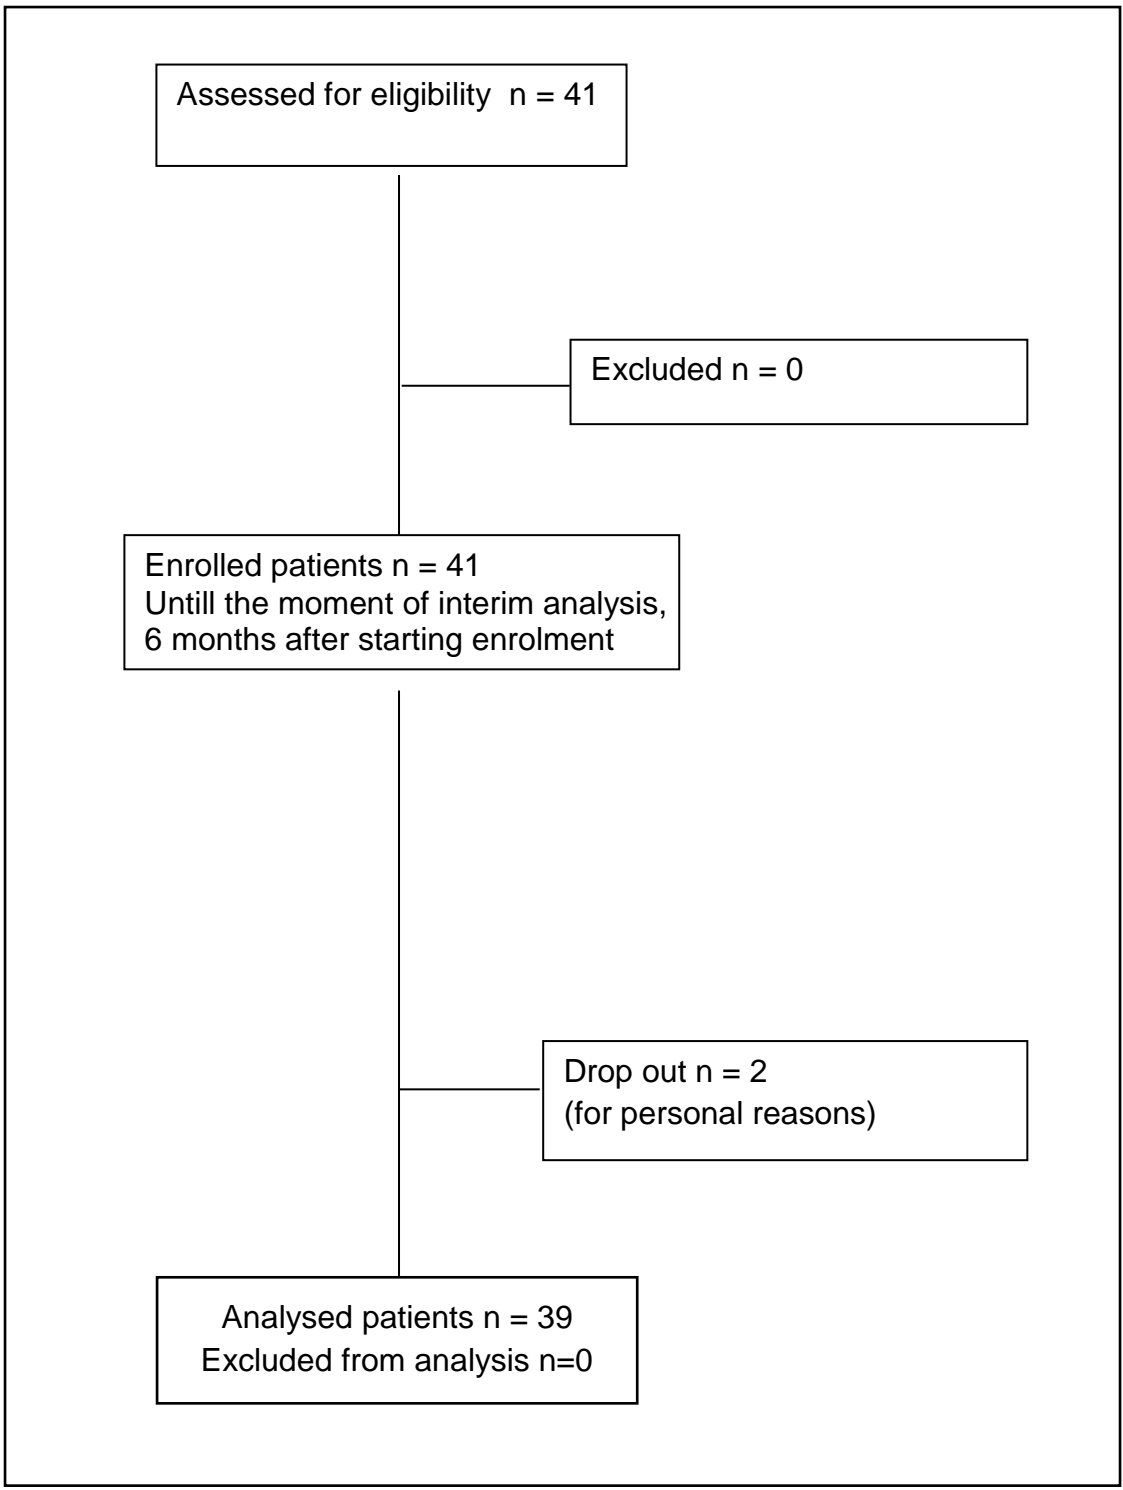

445  
446  
447

**FIG.1:** Flow diagram of the study

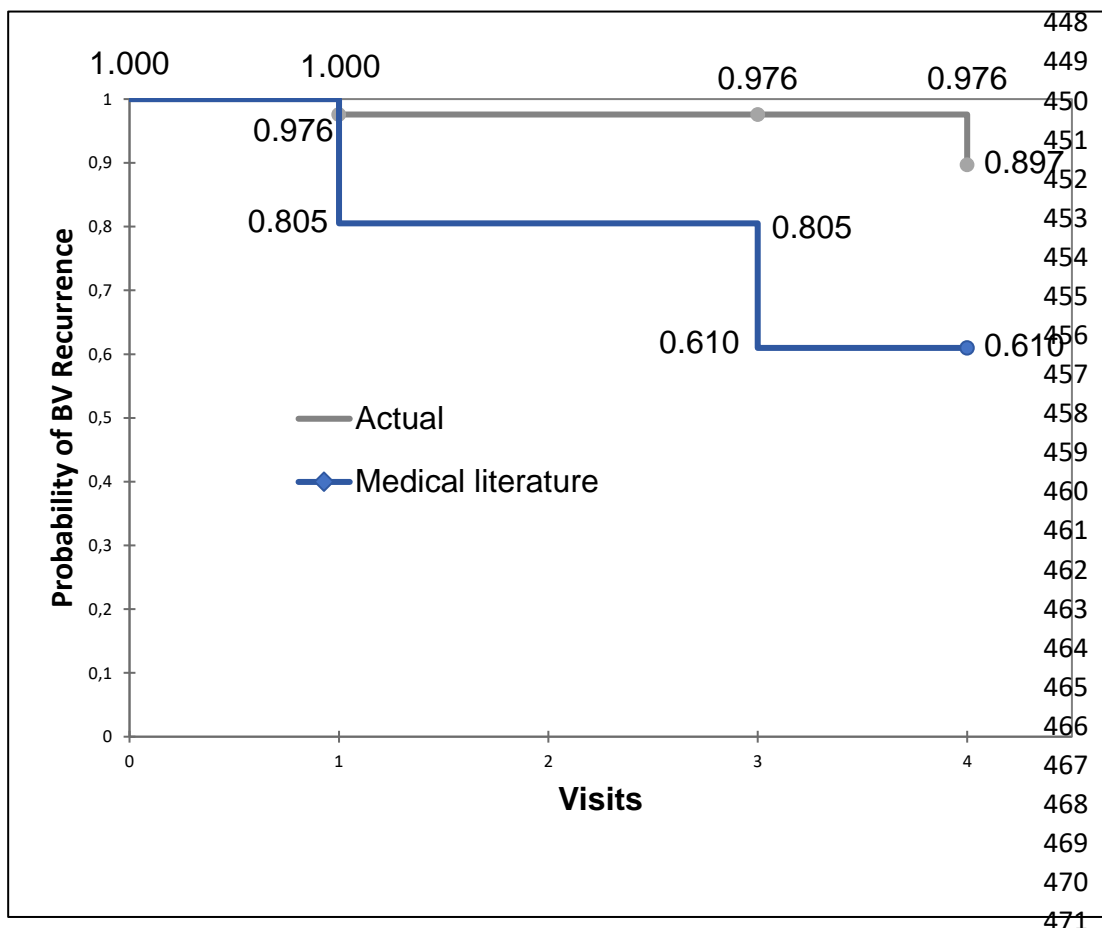

| Visit | At risk | Failed | Censored | Prop. failed | Survival rate | Survival distribution function | Standard error | Lower bound (95%) | Upper bound (95%) |
|-------|---------|--------|----------|--------------|---------------|--------------------------------|----------------|-------------------|-------------------|
| 1     | 41      | 1      | 2        | 0.024        | 0.976         | 0.976                          | 0.024          | 0.846             | 0.996             |
| 3     | 38      | 0      | 1        |              |               |                                |                |                   |                   |
| 4     | 37      | 3      | 34       | 0.081        | 0.919         | 0.897                          | 0.049          | 0.768             | 0.956             |

472 **FIG 2:** Kaplan-Meier survival curve for Bacterial Vaginosis recurrence event

473

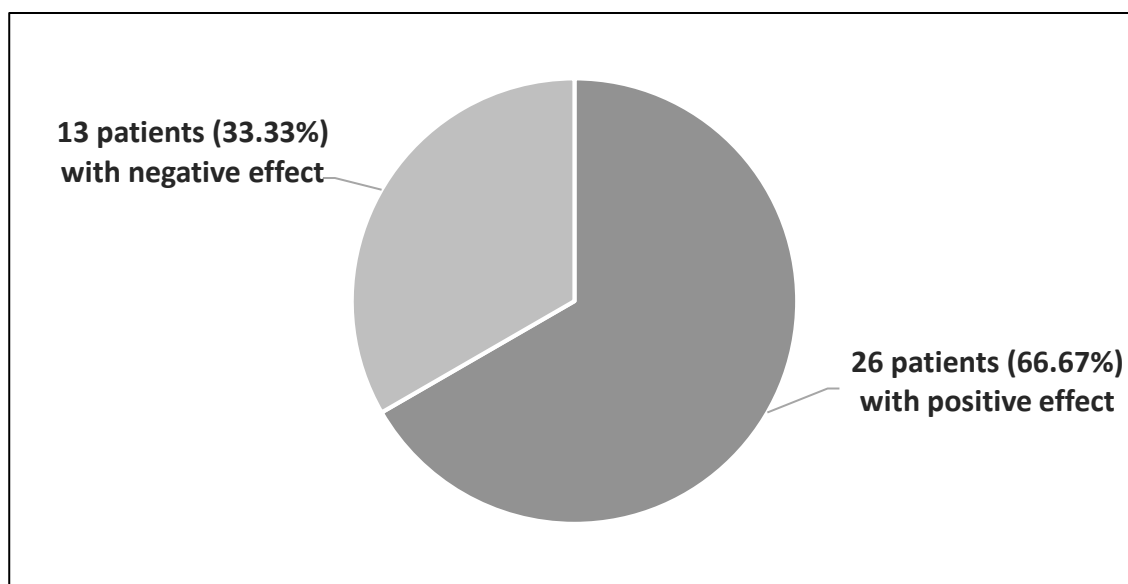

474

475 **FIG 3:** The effect on Lactobacillus concentration level change between baseline  
476 and final visit

477

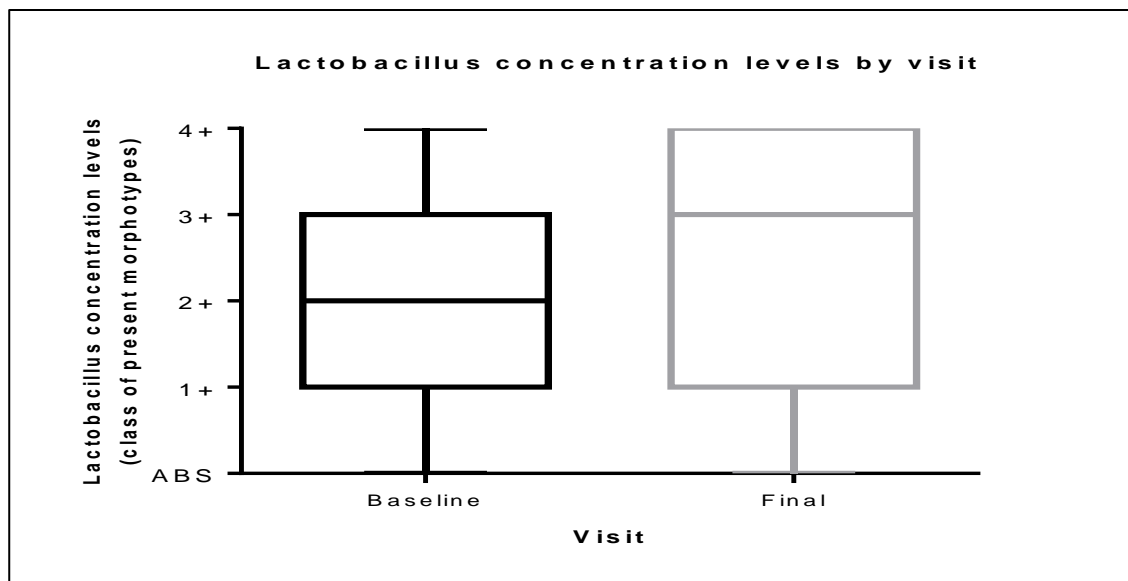

478

479 **FIG 4:** Lactobacillus concentration values between baseline and final visit on the  
480 35 patients without recurrences (Maxwell-Stuart asymptotic marginal homogeneity  
481 test, p-value = 0.022)

482

483 **TABLE 1** Subjects group distribution by age

| <b>Age groups</b>    | <b>N</b> | <b>%</b> |
|----------------------|----------|----------|
| <b>18-24 years</b>   | 12       | 29.27    |
| <b>25-29 years</b>   | 10       | 24.39    |
| <b>30-34 years</b>   | 10       | 24.39    |
| <b>35-39 years</b>   | 5        | 12.20    |
| <b>&gt; 40 years</b> | 4        | 9.76     |
| <b>TOTAL</b>         | 41       | 100.00   |

484

485 **TABLE 2** Number of patients with multiple BV episodes in the last 12 months by trial site

|                   | <b>Site 4</b> | <b>Site 6</b> | <b>Site 7</b> | <b>TOTAL</b><br><b>(%)</b> |
|-------------------|---------------|---------------|---------------|----------------------------|
| <b>2 episodes</b> | 0             | 25            | 1             | 26<br>(63.41)              |
| <b>3 episodes</b> | 5             | 6             | 1             | 12<br>(29.27)              |
| <b>4 episodes</b> | 1             | 2             | 0             | 3<br>(7.32)                |
| <b>TOTAL</b>      | 6             | 33            | 2             | 41<br>(100.00)             |

486

487 **TABLE 3** Number of symptoms and severity at different visits/phone contacts

|                                                               | <b><i>Vaginal Discharge</i></b> | <b><i>Burning</i></b>      | <b><i>Erythema</i></b>                  | <b><i>Dyspareunia</i></b> |
|---------------------------------------------------------------|---------------------------------|----------------------------|-----------------------------------------|---------------------------|
| <b><i>Baseline Visit</i></b>                                  |                                 |                            | 2 Slight                                |                           |
| <b><i>1<sup>st</sup> Phone Contact (1 Month)</i></b>          | 4 Mild<br>1 Abnormal            | 1 Moderate<br>1 Unbearable | 1 Moderate<br>1 Marked<br>1 Very Marked | 3 Present                 |
| <b><i>2<sup>nd</sup> Phone Contact (2 Months)</i></b>         | 1 Mild                          |                            |                                         | 1 Present                 |
| <b><i>3<sup>rd</sup> Phone Contact (3 Months)</i></b>         | 6 Mild                          | 4 Moderate                 | 4 Moderate                              | 4 Present                 |
| <b><i>Final Visit (3-5 days after last Phone Contact)</i></b> | 4 Mild<br>1 Abnormal            | 3 Moderate<br>1 Severe     | 1 Slight<br>2 Moderate<br>1 Very Marked | 4 Present                 |
| <b><i>Number of Symptoms per Visits</i></b>                   | 17                              | 10                         | 13                                      | 12                        |

488 Legend:

489 Vaginal discharge: 0= not present; 1 =mild abnormal; 2= abnormal.

490 Burning: 0 = not present; 1= mild; 2 = moderate; 3 = severe; 4 = unbearable.

491 Erythema: 0 = no symptoms; 1 = slight; 2 = moderate; 3 = marked; 4= very marked.

492 Dyspareunia: 0= absent; 1 = present.
